# Supplementary material for: Mutually exclusive hole and electron transfer coupling in cross stacked acenes
Source: PubMed Central journal article supplement — Chem Sci. 2021 Mar 17;12(14):5064–72. doi: 10.1039/d1sc00520k (PMC8895660; doi:10.1039/d1sc00520k), 2021-03-17
Supplement: SC-012-D1SC00520K-s001.pdf [file SC-012-D1SC00520K-s001.pdf]

# Mutually Exclusive Hole and Electron Transfer Coupling in Cross Stacked Acenes

Alfy Benny, Remya Ramakrishnan, and Mahesh Hariharan\*

School of Chemistry, Indian Institute of Science Education and Research Thiruvananthapuram, Vithura, Thiruvananthapuram, Kerala, India 695551

## Electronic Supplementary Information (ESI) Contents

|                                                                                                                                                                                                                                                                                                                                                                                                                              |          |
|------------------------------------------------------------------------------------------------------------------------------------------------------------------------------------------------------------------------------------------------------------------------------------------------------------------------------------------------------------------------------------------------------------------------------|----------|
| <b>Section A: Materials and Methods</b> .....                                                                                                                                                                                                                                                                                                                                                                                | <b>1</b> |
| <b>Computational Methods</b> .....                                                                                                                                                                                                                                                                                                                                                                                           | <b>2</b> |
| <b>Transition charge method utilizing the transition charge from electrostatic potential (TrESP)<sup>3</sup></b> .....                                                                                                                                                                                                                                                                                                       | <b>2</b> |
| <b>Charge Transport Mobility<sup>5</sup></b> .....                                                                                                                                                                                                                                                                                                                                                                           | <b>2</b> |
| <b>Section B: Tables</b> .....                                                                                                                                                                                                                                                                                                                                                                                               | <b>3</b> |
| Table S1: HOMO-1, HOMO, LUMO, and LUMO+1 energy for Greek cross (+) stacked acene systems ( $d_i = 4 \text{ \AA}$ ). .....                                                                                                                                                                                                                                                                                                   | <b>3</b> |
| Table S2: Hole and electron reorganization energies of linear and non-linear acenes. ....                                                                                                                                                                                                                                                                                                                                    | <b>4</b> |
| Table S3: Coulombic coupling ( $J_{\text{Coul}}$ ) for the eclipsed dimers of the selected acene candidates. ....                                                                                                                                                                                                                                                                                                            | <b>4</b> |
| <b>Section C: Figures</b> .....                                                                                                                                                                                                                                                                                                                                                                                              | <b>5</b> |
| Fig. S1: Frontier Molecular Orbitals of (a) naphthalene, (b) anthracene, (c) tetracene, (d) pentacene, (e) pyrene, (f) perylene (g) ovalene and (h) nanographene .....                                                                                                                                                                                                                                                       | <b>5</b> |
| Fig. S2: $J_{\text{Coul}}$ of two transition dipoles (with magnitude of 1 Debye each) placed at an interplanar distance of $1 \text{ \AA}$ at varying slip angle ( $\theta$ ) and rotational angle ( $\alpha$ ). .....                                                                                                                                                                                                       | <b>5</b> |
| Fig. S5: Oscillator strengths ( $f$ ) for different electronic states of (a) pyrene, (b) perylene (c) ovalene and (d) nanographene dimers at various rotational angles. Equal $f$ is observed at $\alpha = 90^\circ$ for $S_1$ and $S_2$ ( $S_3$ and $S_4$ ) electronic states. ....                                                                                                                                         | <b>8</b> |
| Fig. S6: Electronic excitation energies ( $\Delta E$ ) to first four excited states in (a) naphthalene, (b) anthracene, (c) tetracene, (d) pentacene, (e) pyrene, (f) perylene, (g) ovalene and (h) nanographene dimers at various rotational angles. $\Delta E$ for $S_1 \leftarrow S_0$ and $S_2 \leftarrow S_0$ ( $S_3 \leftarrow S_0$ and $S_4 \leftarrow S_0$ ) transitions is degenerate at $\alpha = 90^\circ$ . .... | <b>9</b> |
| <b>References</b> .....                                                                                                                                                                                                                                                                                                                                                                                                      | <b>9</b> |

### Section A: Materials and Methods

## Computational Methods

All the calculations are carried out with  $\omega$ B97XD functional and 6-311+G(d) basis set using Gaussian 16 program unless stated otherwise.<sup>1</sup> The acene monomers were optimized, and frequency calculations were carried out where no imaginary frequency was found. The highest occupied molecular orbital (HOMO) and lowest unoccupied molecular orbital (LUMO) of acenes are generated from the cube files of energy calculation. Two optimized monomers were placed at specific interplanar distances and twist angles for further charge transfer coupling and TDDFT calculations. The TrESP calculations were carried out with the basis set of 6-311G(d). Electron and hole transfer integral values were calculated by employing the CATNIP Tool version 1.9,<sup>2</sup> using the outputs of energy calculations of dimers and their monomers from Gaussian 16. The 3D surface plots were initially plotted in MATLAB, and the surface is exported as .stl format to Blender 2.9 for colouring and rendering (cycles).

## Transition charge method utilizing the transition charge from electrostatic potential (TrESP)<sup>3</sup>

In order to obtain accurate Coulombic coupling ( $J_{\text{Coul}}$ ) between chromophores, transition charge method is utilized in the current manuscript. The point atomic charges ( $q$ ) for a monomer is obtained by the transition charge from electrostatic potential (TrESP), and the excitonic coupling corresponds to the Coulomb interaction of transition charges of two monomers:-

$$J_{\text{Coul}} = \frac{1}{4\pi\epsilon_0} \sum_i \sum_j \frac{q_i q_j}{|r_i - r_j|}$$

where  $q_i$  ( $q_j$ ) represents the transition charge on atom  $i$  (atom  $j$ ) of monomer 1 (monomer 2) in a dimer. Similarly,  $r_i$  ( $r_j$ ) refers to the position vectors of atom  $i$  (atom  $j$ ) of monomer 1 (monomer 2) in a dimer. The TrESP transition charges were obtained from Multiwfn program package.<sup>4</sup>

## Charge Transport Mobility<sup>5</sup>

The charge transfer rate ( $k_i$ ), which represents the rate of hole/electron hopping from a monomer to the  $i^{\text{th}}$  neighbour was obtained through the Marcus-Hush equation:

$$k_i = \frac{t^2}{\hbar} \left( \frac{\pi}{\lambda k_B T} \right)^{\frac{1}{2}} e^{\frac{-\lambda}{4k_B T}}$$

where  $t$  is the charge transfer coupling between the monomers of a dimer,  $\lambda$  is the reorganization energy for the hole ( $\lambda_h$ ) or electron ( $\lambda_e$ ) transport,  $k_B$  is the Boltzmann constant, and  $T$  is the temperature (300 K). The reorganization energy can be calculated using the following formula:

$$\lambda_{\pm} = (E_0^* - E_0) + (E_{\pm}^* - E_{\pm})$$

in which  $E_0$  and  $E_{\pm}$  are the lowest energies of neutral and cationic/anionic species, respectively. For hole reorganization energy ( $\lambda_h$ ),  $E_0^*$  is the energy of a neutral molecule with cation geometry, while for the electron reorganization energy ( $\lambda_e$ ),  $E_0^*$  corresponds to the energy of the neutral molecule with anion geometry.

The 1-dimensional (1D) charge mobility from charge hopping is calculated using the following equation:

$$\mu = \frac{1}{2n} \frac{e}{k_B T} \sum_i r_i^2 W_i P_i$$

Where  $n$  is the special dimensionality,  $i$  corresponds to a specific hopping pathway along the hopping distance  $r_i$ ,  $P$  is the hopping probability, and  $W_i$  is the charge hopping rate.

## Section B: Tables

**Table S1:** HOMO-1, HOMO, LUMO, and LUMO+1 energy for Greek cross (+) stacked acene systems ( $d_i = 4 \text{ \AA}$ ).

| Linear Acene       | Molecular Orbital | Energy (eV) | Non-linear acene    | Molecular Orbital | Energy (eV) |
|--------------------|-------------------|-------------|---------------------|-------------------|-------------|
| ${}^2N_{90^\circ}$ | LUMO+1            | 0.6089      | ${}^2Py_{90^\circ}$ | LUMO+1            | 0.1309      |
|                    | LUMO              | 0.6089      |                     | LUMO              | -0.0786     |
|                    | HOMO              | -7.6450     |                     | HOMO              | -7.2009     |
|                    | HOMO-1            | -8.0322     |                     | HOMO-1            | -7.2009     |
| ${}^2A_{90^\circ}$ | LUMO+1            | -0.1238     | ${}^2Pe_{90^\circ}$ | LUMO+1            | -0.4471     |
|                    | LUMO              | -0.1374     |                     | LUMO              | -0.4471     |
|                    | HOMO              | -7.1941     |                     | HOMO              | -6.7854     |
|                    | HOMO-1            | -7.1941     |                     | HOMO-1            | -6.8335     |
| ${}^2T_{90^\circ}$ | LUMO+1            | -0.6482     | ${}^2Ov_{90^\circ}$ | LUMO+1            | -0.5858     |
|                    | LUMO              | -0.6482     |                     | LUMO              | -0.7282     |
|                    | HOMO              | -6.6616     |                     | HOMO              | -6.6164     |
|                    | HOMO-1            | -6.8599     |                     | HOMO-1            | -6.6164     |
| ${}^2P_{90^\circ}$ | LUMO+1            | -1.0304     | ${}^2Nn_{90^\circ}$ | LUMO+1            | -0.7249     |
|                    | LUMO              | -1.0372     |                     | LUMO              | -0.7573     |
|                    | HOMO              | -6.4619     |                     | HOMO              | -6.5361     |
|                    | HOMO-1            | -6.4619     |                     | HOMO-1            | -6.5372     |

**Table S2:** Hole and electron reorganization energies of linear and non-linear acenes.

| Chromophore  | $\lambda_h$ (eV) | $\lambda_e$ (eV) |
|--------------|------------------|------------------|
| Naphthalene  | 0.188            | 0.247            |
| Anthracene   | 0.143            | 0.202            |
| Tetracene    | 0.116            | 0.164            |
| Pentacene    | 0.096            | 0.134            |
| Pyrene       | 0.153            | 0.216            |
| Perylene     | 0.151            | 0.171            |
| Ovalene      | 0.093            | 0.122            |
| Nanographene | 0.080            | 0.103            |

**Table S3:** Coulombic coupling ( $J_{\text{Coul}}$ ) for the eclipsed dimers of the selected acene candidates.

| Dimer             | Transition           | $d_i$ (Å) | $J_{\text{Coul}}$ (eV) |
|-------------------|----------------------|-----------|------------------------|
| ${}^2\text{N}_0$  | $S_2 \leftarrow S_0$ | 8         | 0.005                  |
| ${}^2\text{A}_0$  | $S_1 \leftarrow S_0$ | 8         | 0.007                  |
| ${}^2\text{T}_0$  | $S_1 \leftarrow S_0$ | 8         | 0.008                  |
| ${}^2\text{P}_0$  | $S_1 \leftarrow S_0$ | 8         | 0.009                  |
| ${}^2\text{Py}_0$ | $S_2 \leftarrow S_0$ | 8         | 0.016                  |
| ${}^2\text{Pe}_0$ | $S_1 \leftarrow S_0$ | 8         | 0.025                  |
| ${}^2\text{Ov}_0$ | $S_1 \leftarrow S_0$ | 8         | 0.013                  |
| ${}^2\text{Nn}_0$ | $S_1 \leftarrow S_0$ | 8         | 0.015                  |

## Section C: Figures

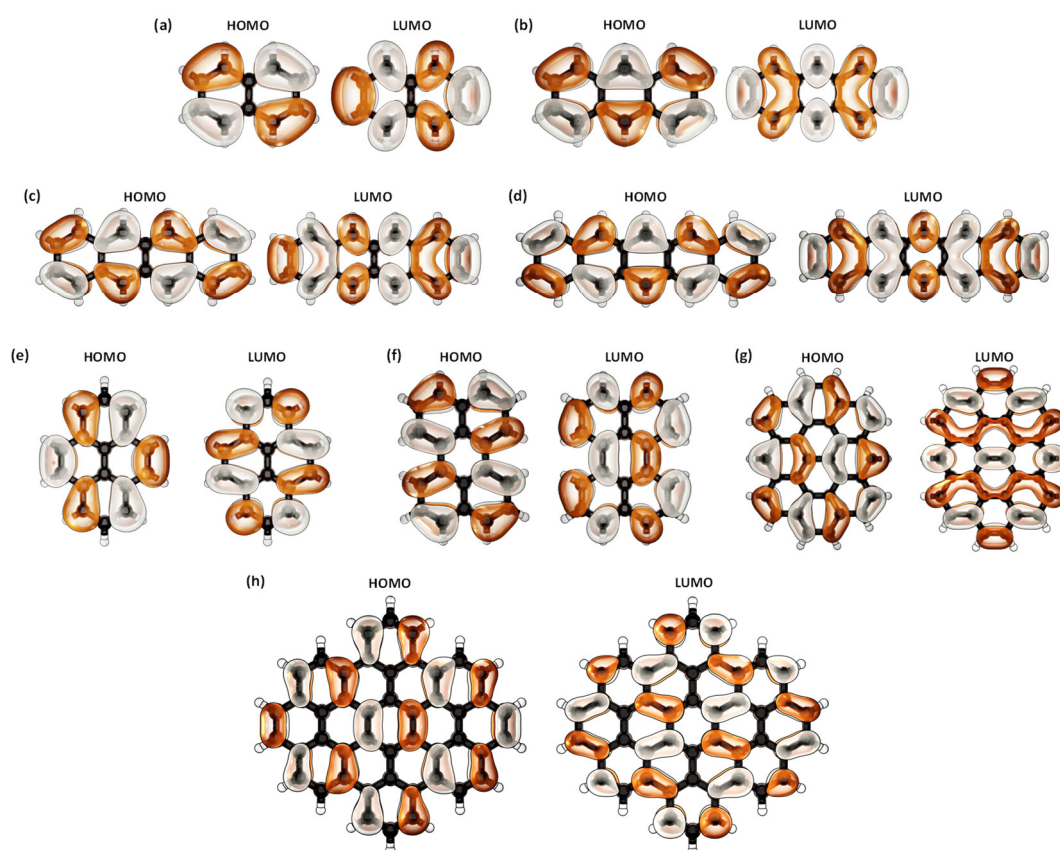

**Fig. S1:** Frontier Molecular Orbitals of (a) naphthalene, (b) anthracene, (c) tetracene, (d) pentacene, (e) pyrene, (f) perylene (g) ovalene and (h) nanographene.

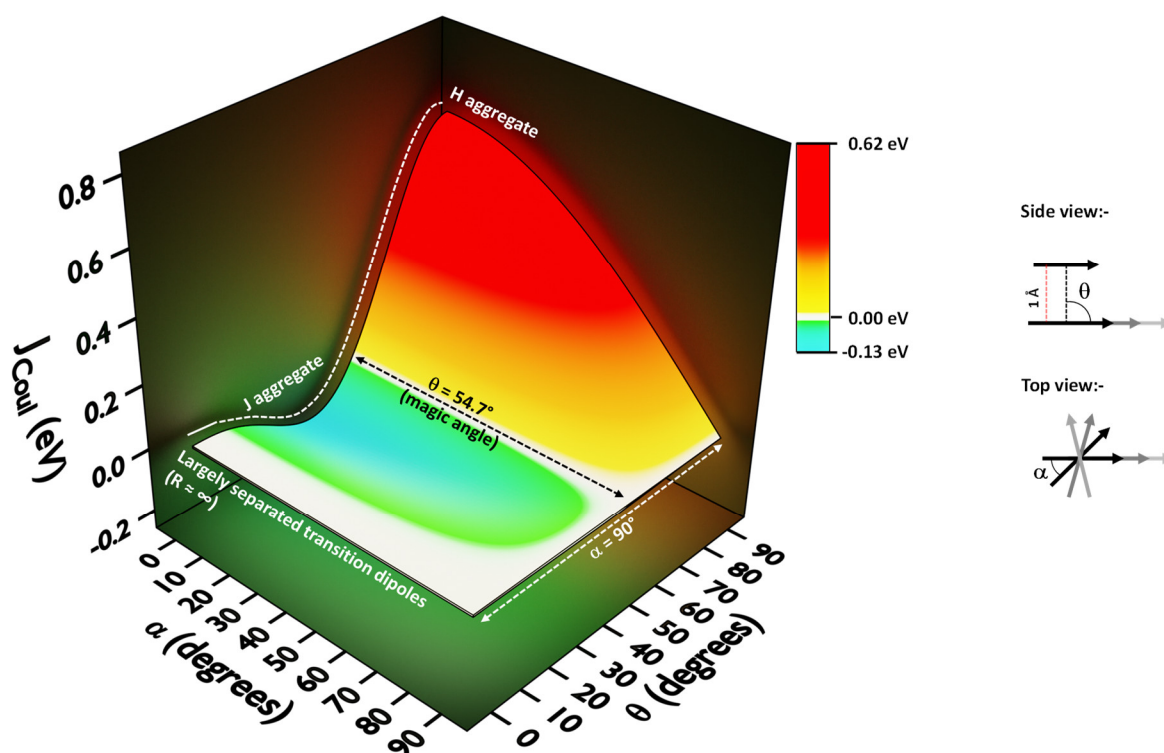

**Fig. S2:**  $J_{\text{Coul}}$  of two transition dipoles (with magnitude of 1 Debye each) placed at an interplanar distance of 1 Å at varying slip angle ( $\theta$ ) and rotational angle ( $\alpha$ ). The orientation factor ( $\kappa$ ) =  $\cos\alpha(1 - 3\cos^2\theta)$ .

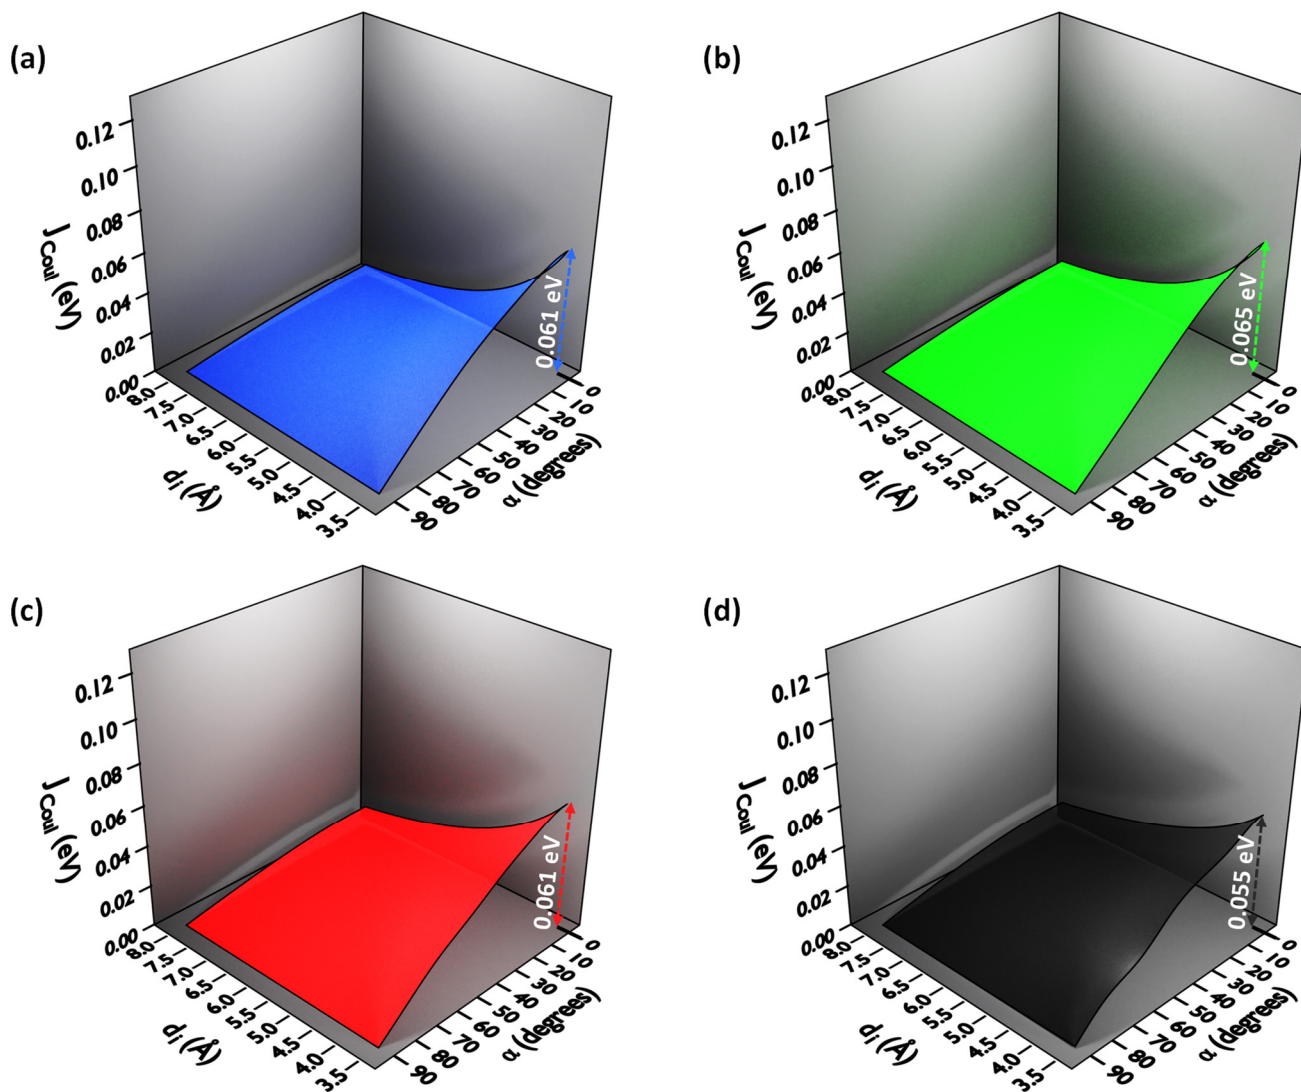

**Fig. S3:**  $J_{\text{Coul}}$  of dimers of (a) anthracene, (b) pentacene, (c) ovalene and (d) nanographene at various interplanar spacing ( $d_i$ ) and rotational angles ( $\alpha$ ).

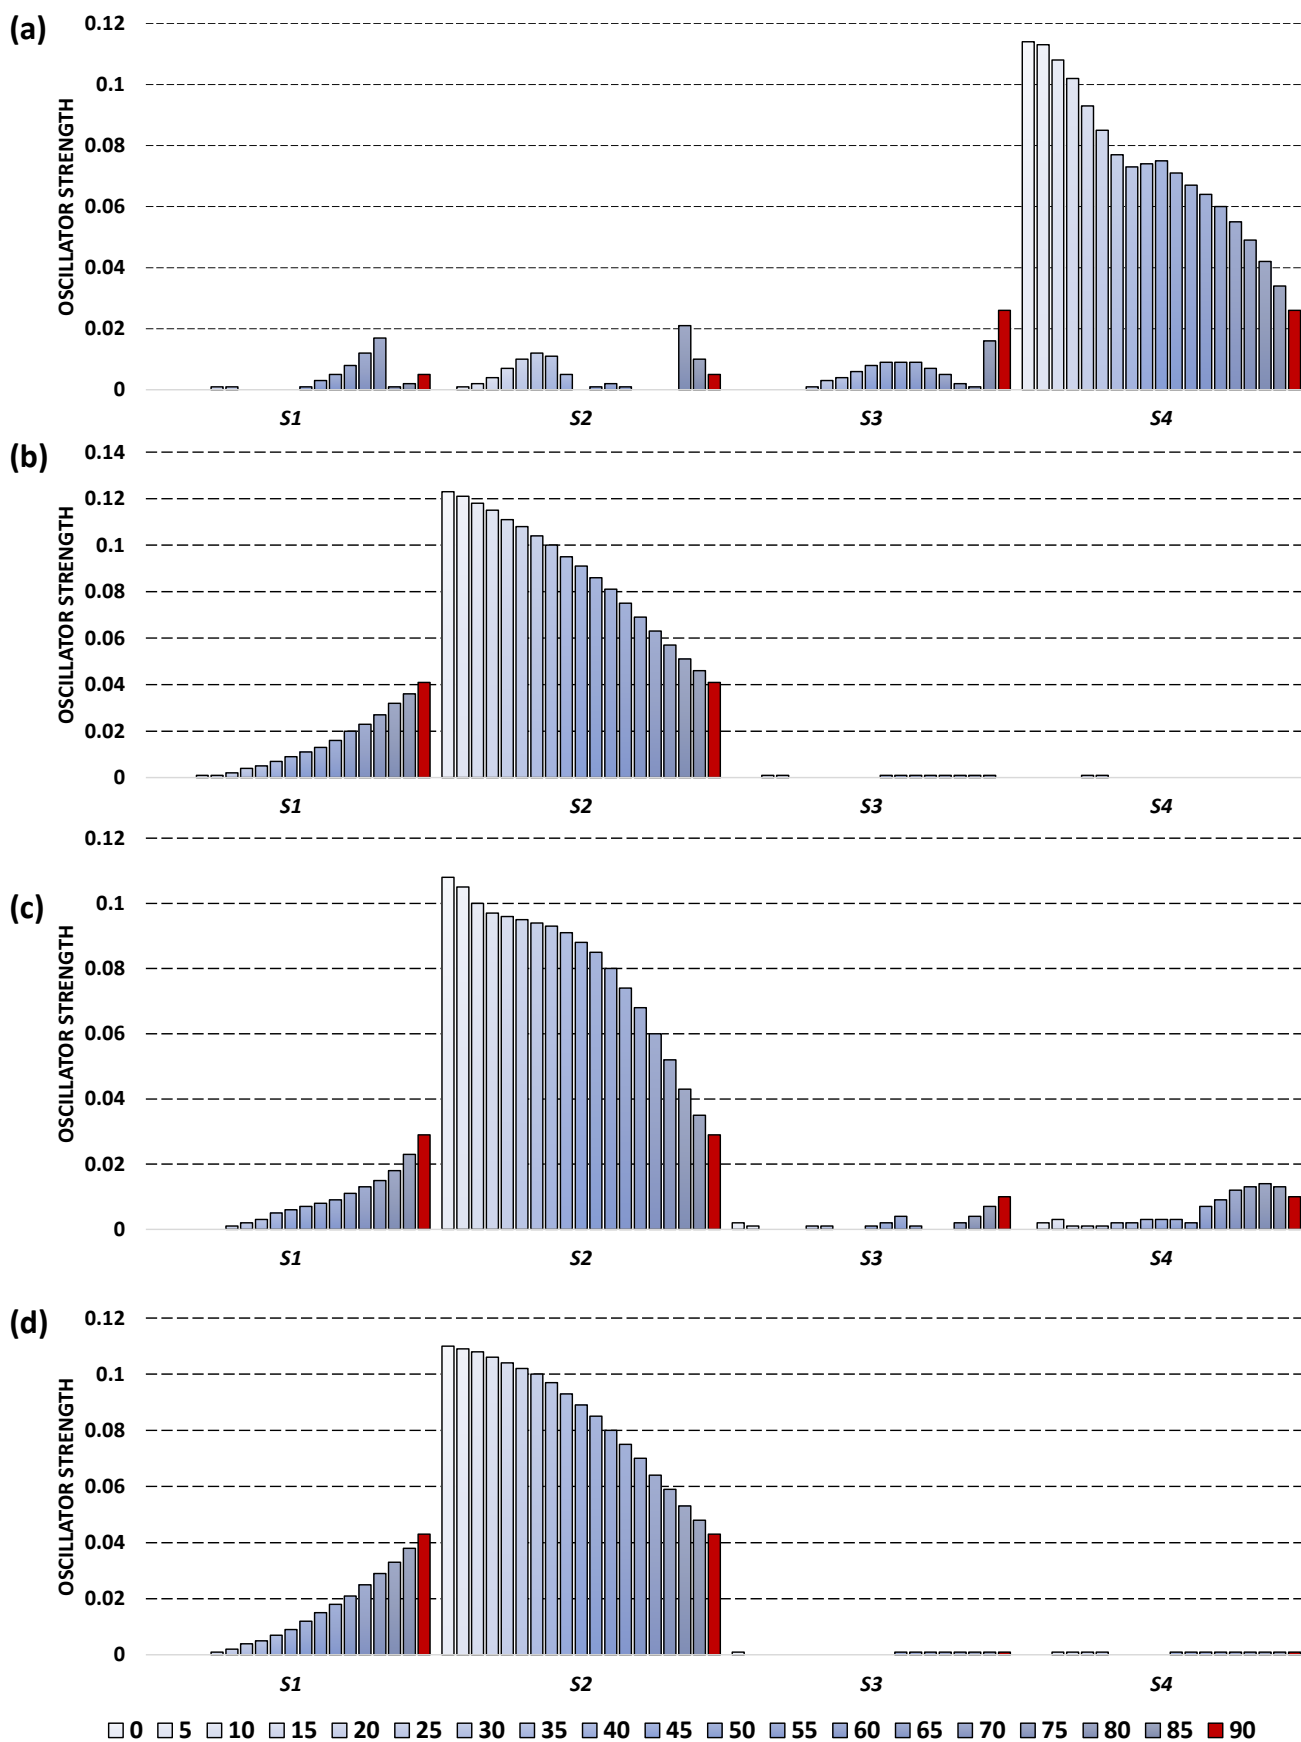

**Fig. S4:** Oscillator strengths ( $f$ ) for first four electronic states of (a) naphthalene, (b) anthracene, (c) tetracene and (d) pentacene dimers at various rotational angles. Equal  $f$  is observed at  $\alpha = 90^\circ$  for  $S_1$  and  $S_2$  ( $S_3$  and  $S_4$ ) electronic states.

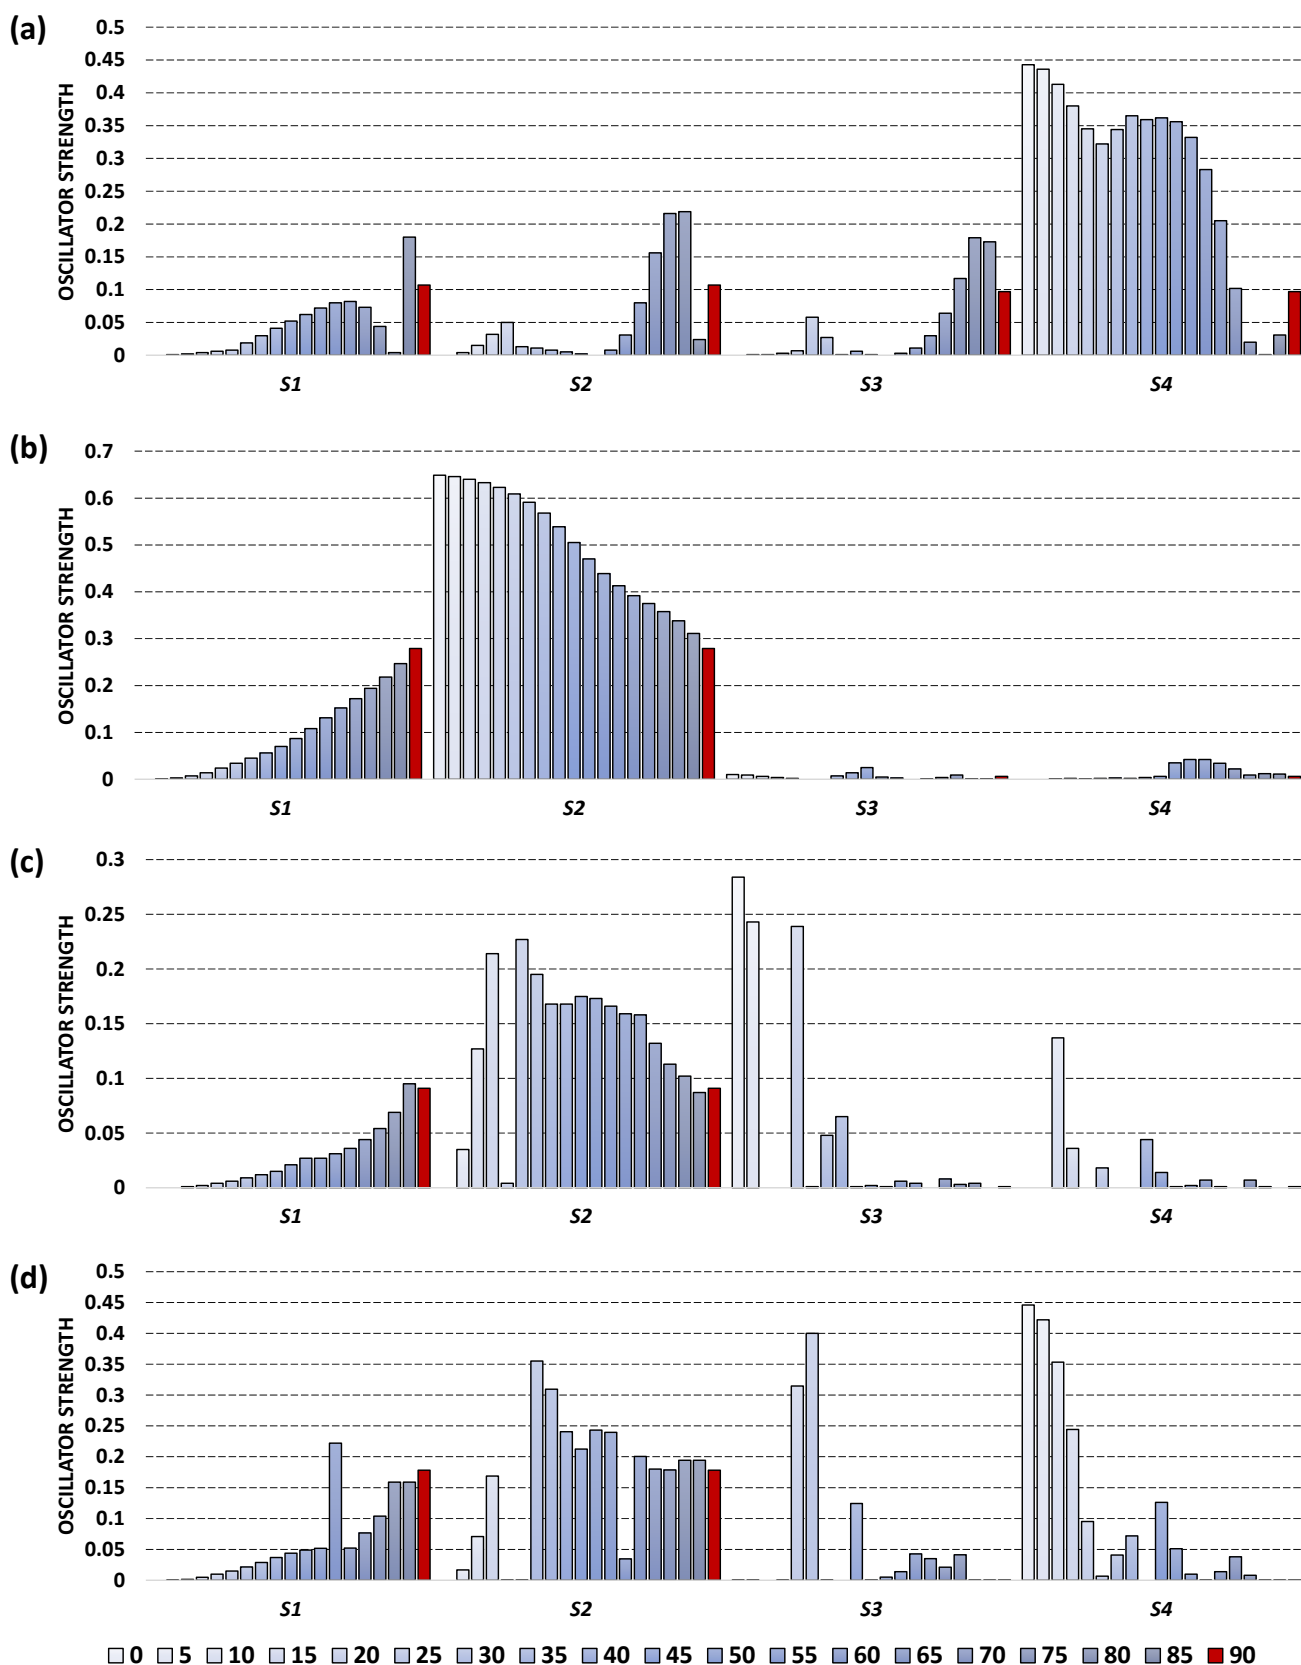

**Fig. S5:** Oscillator strengths ( $f$ ) for different electronic states of (a) pyrene, (b) perylene (c) ovalene and (d) nanographene dimers at various rotational angles. Equal  $f$  is observed at  $\alpha = 90^\circ$  for  $S_1$  and  $S_2$  ( $S_3$  and  $S_4$ ) electronic states.



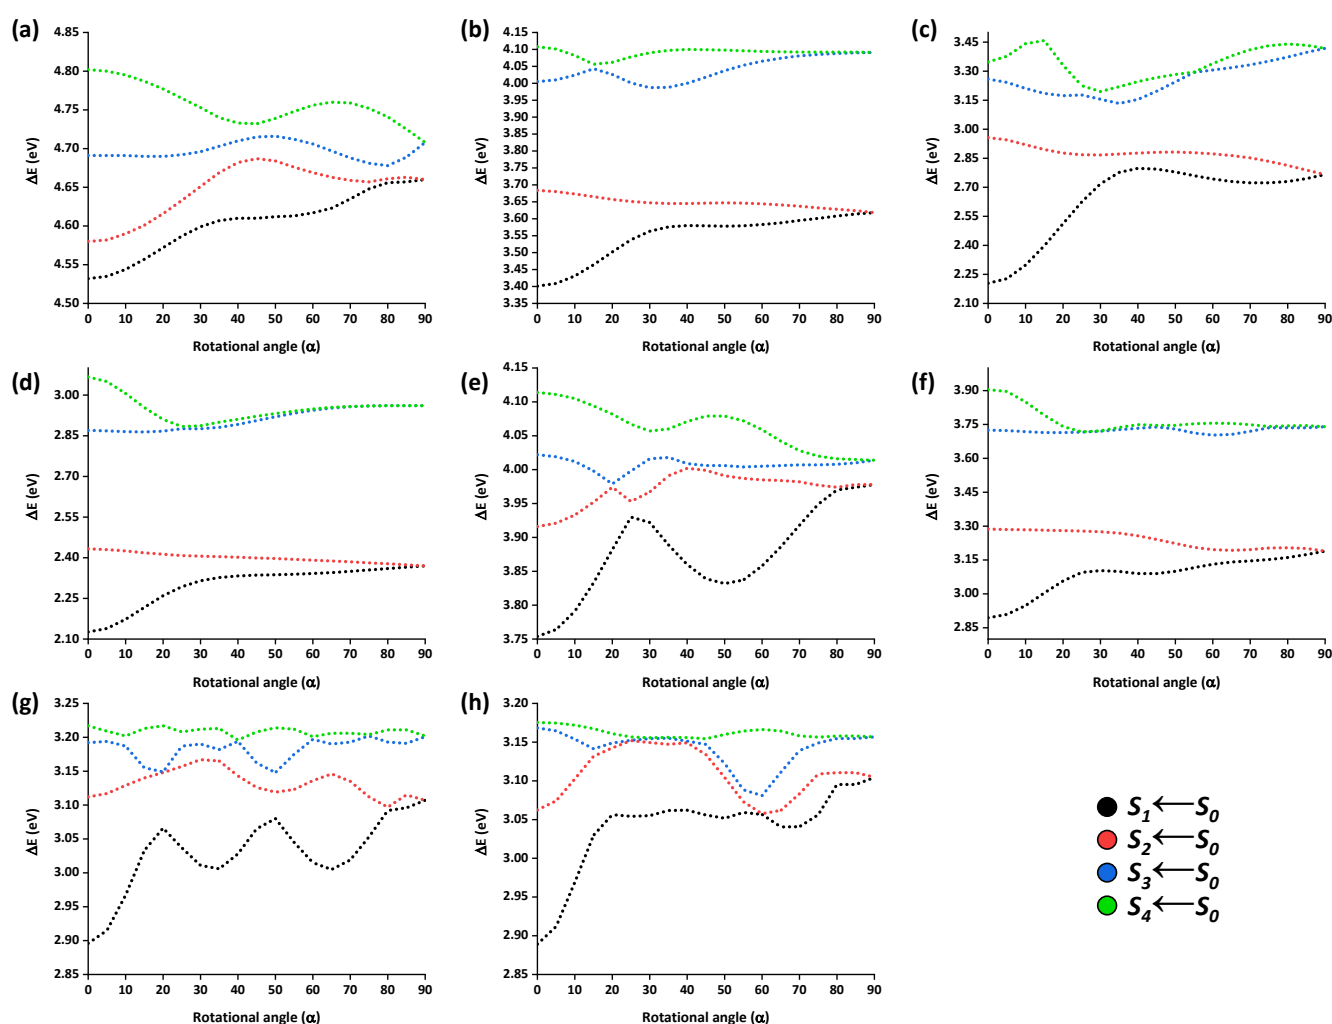

**Fig. S6:** Electronic excitation energies ( $\Delta E$ ) to first four excited states in (a) naphthalene, (b) anthracene, (c) tetracene, (d) pentacene, (e) pyrene, (f) perylene, (g) ovalene and (h) nanographene dimers at various rotational angles.  $\Delta E$  for  $S_1 \leftarrow S_0$  and  $S_2 \leftarrow S_0$  ( $S_3 \leftarrow S_0$  and  $S_4 \leftarrow S_0$ ) transitions is degenerate at  $\alpha = 90^\circ$ .

## References

- (1) Frisch, M. J.; Trucks, G. W.; Schlegel, H. B.; Scuseria, G. E.; Robb, M. a.; Cheeseman, J. R.; Scalmani, G.; Barone, V.; Petersson, G. a.; Nakatsuji, H.; Li, X.; Caricato, M.; Marenich, a. V.; Bloino, J.; Janesko, B. G.; Gomperts, R.; Mennucci, B.; Hratchian, H. P.; Ortiz, J. V.; Izmaylov, a. F.; Sonnenberg, J. L.; Williams, Ding, F.; Lipparini, F.; Egidi, F.; Goings, J.; Peng, B.; Petrone, A.; Henderson, T.; Ranasinghe, D.; Zakrzewski, V. G.; Gao, J.; Rega, N.; Zheng, G.; Liang, W.; Hada, M.; Ehara, M.; Toyota, K.; Fukuda, R.; Hasegawa, J.; Ishida, M.; Nakajima, T.; Honda, Y.; Kitao, O.; Nakai, H.; Vreven, T.; Throssell, K.; Montgomery Jr., J. a.; Peralta, J. E.; Ogliaro, F.; Bearpark, M. J.; Heyd, J. J.; Brothers, E. N.; Kudin, K. N.; Staroverov, V. N.; Keith, T. a.; Kobayashi, R.; Normand, J.; Raghavachari, K.; Rendell, a. P.; Burant, J. C.; Iyengar, S. S.; Tomasi, J.; Cossi, M.; Millam, J. M.; Klene, M.; Adamo, C.; Cammi, R.; Ochterski, J. W.; Martin, R. L.; Morokuma, K.; Farkas, O.; Foresman, J. B.; Fox, D. J. G16\_C01. 2016, p Gaussian 16, Revision C.01, Gaussian, Inc., Wallin.
- (2) GitHub - JoshuaSBrown/QC\_Tools: This Small Repository Provides Functionality for Calculating the Charge Transfer Integrals between Two Molecules. [https://Github.Com/JoshuaSBrown/QC\\_Tools](https://Github.Com/JoshuaSBrown/QC_Tools).
- (3) M. E. Madjet, A. Abdurahman and T. Renger, *J. Phys. Chem. B*, 2006, **110**, 17268–17281.
- (4) T. Lu and F. Chen, *J. Comput. Chem.*, 2012, **33**, 580–592.
- (5) Deng, W. Q.; Sun, L.; Huang, J. D.; Chai, S.; Wen, S. H.; Han, K. L. Quantitative Prediction of Charge Mobilities of  $\pi$ -Stacked Systems by First-Principles Simulation. *Nat. Protoc.* **2015**, *10*, 632–642.
